# Supplementary material for: Nanoporous carbon derived from a functionalized metal–organic framework as a highly efficient oxygen reduction electrocatalyst
Source: Royal Society of Chemistry journal article supplement (doi:10.1039/c6nr07268b), 2016-12-20
Supplement: c6nr07268b1.pdf [file c6nr07268b1.pdf]

## Supporting information

### **Nanoporous Carbon Derived from a Functionalized Metal–Organic Framework as Highly Efficient Oxygen Reduction Electrocatalyst**

Yuan Wang,<sup>a</sup> Xitong Chen,<sup>b</sup> Qipu Lin,<sup>b</sup> Aiguo Kong,<sup>b</sup> Quan-Guo Zhai,<sup>b</sup> Shilei Xie,<sup>b</sup> and Pingyun Feng<sup>\*a,b</sup>

a. Materials Science and Engineering Program, University of California-Riverside, Riverside, CA, 92521, United States

b. Department of Chemistry, University of California-Riverside, Riverside, CA, 92521, United States

\* E-mail: pingyun.feng@ucr.edu

The XRD peaks of MOF-253-Fe in Figure S1 correspond well to that of MOF-253 with only a slightly shifting which may be originated from a disorder in the crystal structure. X-ray photoelectron spectroscopy (XPS) analysis was performed to confirm the chemical state and coordination environment of Fe atom upon insertion within the framework. The high resolution N1s spectra of MOF-253-Fe in – Figure S2 demonstrate the presence of metal N fitting binding energies of 399.6 eV.<sup>1, 2</sup> The binding energies of the Fe2p (around 711 eV) in Figure S2 could be ascribed to the N-coordinated Fe<sup>3+</sup> or Fe<sup>2+</sup>.<sup>3, 4</sup> These features are all attributed to the binding of FeCl<sub>2</sub> to pyridine, which may lead to Fe-2,2' -bipyridine distribution throughout of MOF-253.

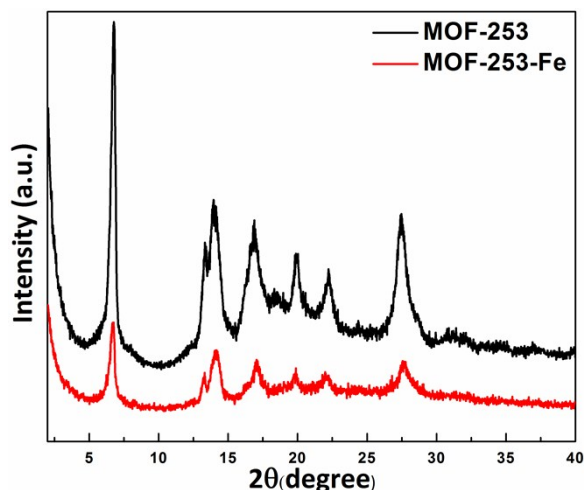

**Figure S1.** XRD patterns of MOF-253 and MOF-253-Fe.

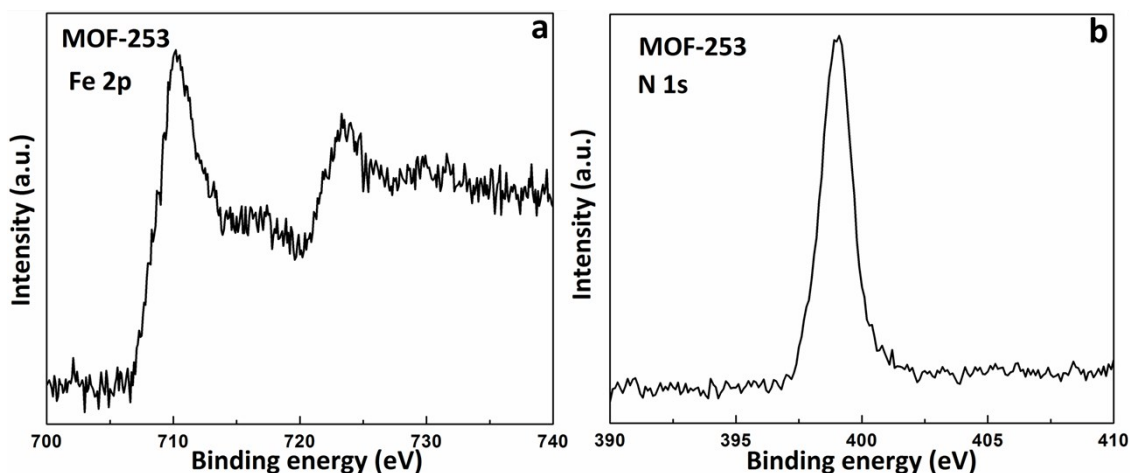

**Figure S2.** High-resolution Fe 2p and N 1s XPS spectra of MOF-253-Fe.

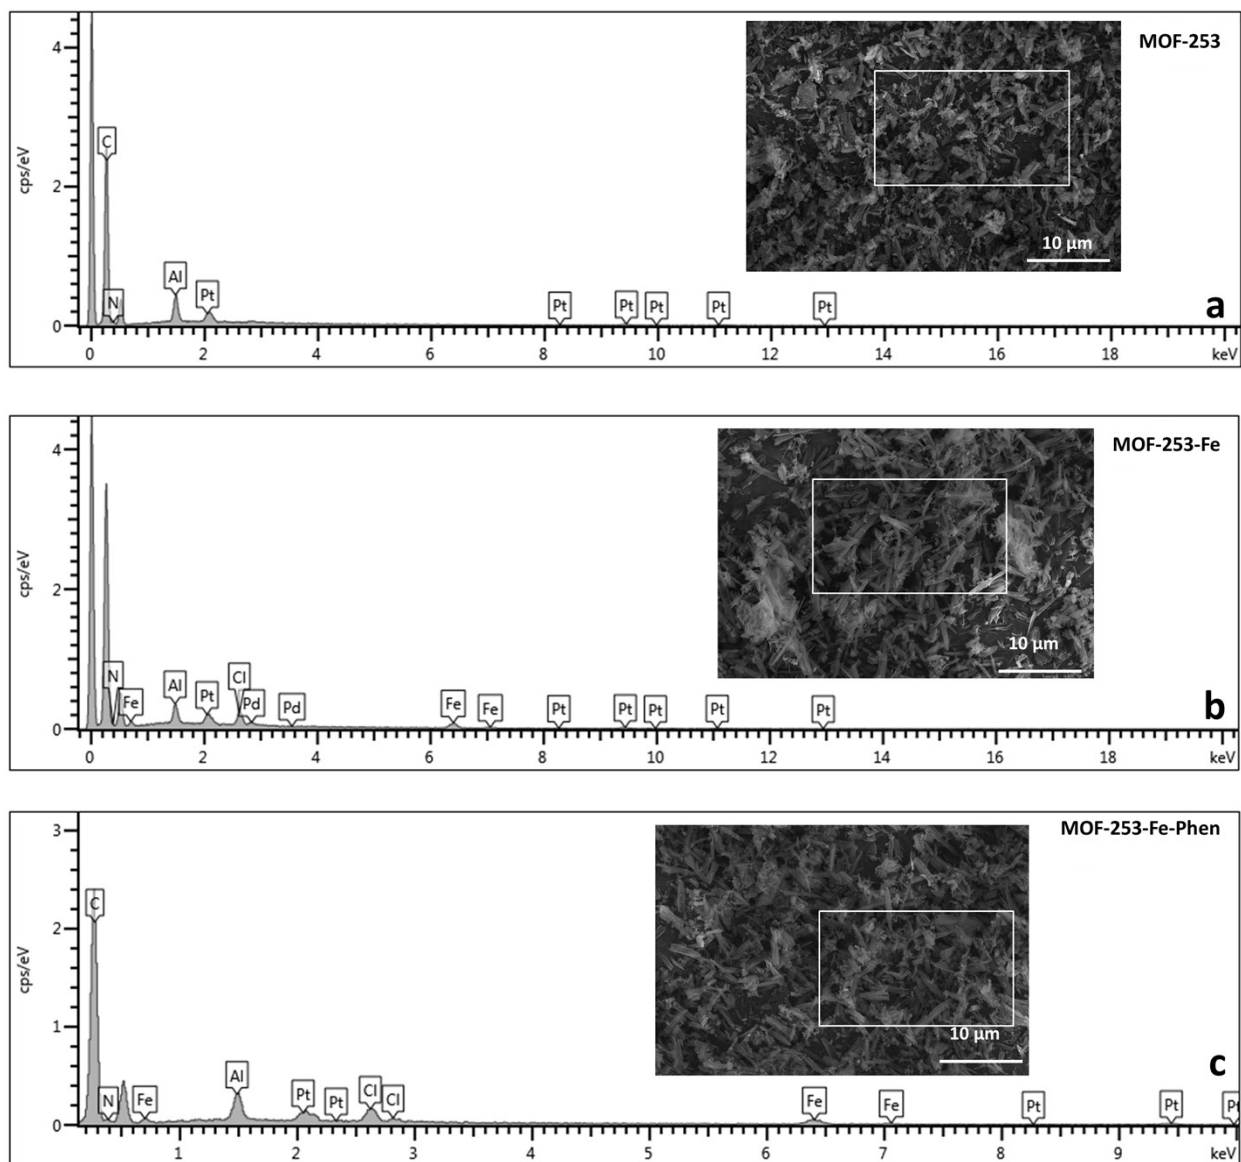

**Figure S3.** EDX spectrum of MOF-253, MOF-253-Fe and MOF-253-Fe-Phen.

MOF-253 (Al(OH)(bpydc) (Anal. Calcd for  $C_{12}H_7AlN_2O_5$ ) is synthesized according to the procedure reported in literature. (For detailed synthetic procedures, please refer to the Experimental part.) EDS analysis showed that the molar ratio of Al/N was 1:2.25 which is close to the theoretical value of 1:2.

After MOF-253 is synthesized, it is modified with  $FeCl_2$  in acetonitrile to form Fe incorporated compound which is named as MOF-253-Fe. The compounds Al(OH)(bpydc) (3.5 mmol) and  $FeCl_2$  (3.5 mmol) were stirred and then collected by filtration and washing with acetonitrile. EDS analysis showed that the molar ratio of Fe/Al was 0.64:1, matching well with the atomic ratio of 0.7:1 measured by inductively coupled plasma optical emission spectrometry (ICP-OES) analysis (ESI). EDS analysis measure on the same sample showed that the molar ratio of Al/N was 1:2.12.

The above obtained dry MOF-253-Fe, mixed with 1,10-Phenanthroline (7 mmol) in acetonitrile was stirred, followed by filtration and dried under vacuum. The formed MOF-253-Fe-phen composite was also analysed by EDS. The molar ratio of Fe/Al was 0.53:1 which is a little bit smaller than that of MOF-253-Fe. This is because of the possible dissolution of some of Fe species into solutions after the subsequent stirring with 1,10-Phenanthroline. In our expectation, after the addition of 1,10-Phenanthroline, Fe which was chelated with the ligand of MOF-253 would chelate with two portion of 1,10-Phenanthroline. Thus, if the molar ratio of Fe/Al is 0.53:1, plus with the nitrogen atoms in the ligand, Fe/N ratio of the as-synthesized compound should be around 0.53: (0.53\*4+2) = 0.53:4. EDS analysis showed that the molar ratio of Fe/Al/N in the formed compound was 0.53:1:3.5, which match well with the above calculated data.

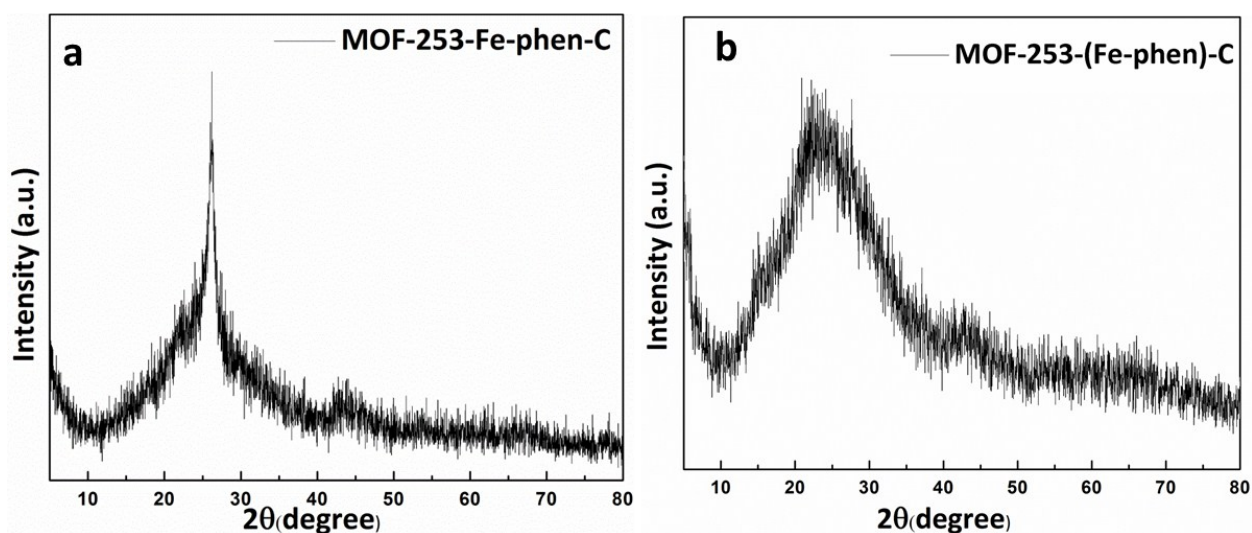

**Figure S4.** XRD patterns of MOF-253-Fe-phen-C (a), MOF-253-(Fe-Phen)-C (b).

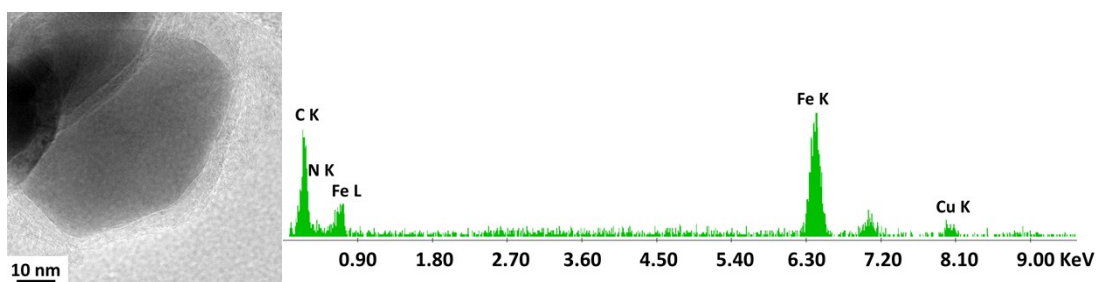

**Figure S5.** EDX spectrum of Fe<sub>3</sub>C nanoparticles which are wrapped by carbon graphitic carbon layers in MOF-253-Fe-phen-C.

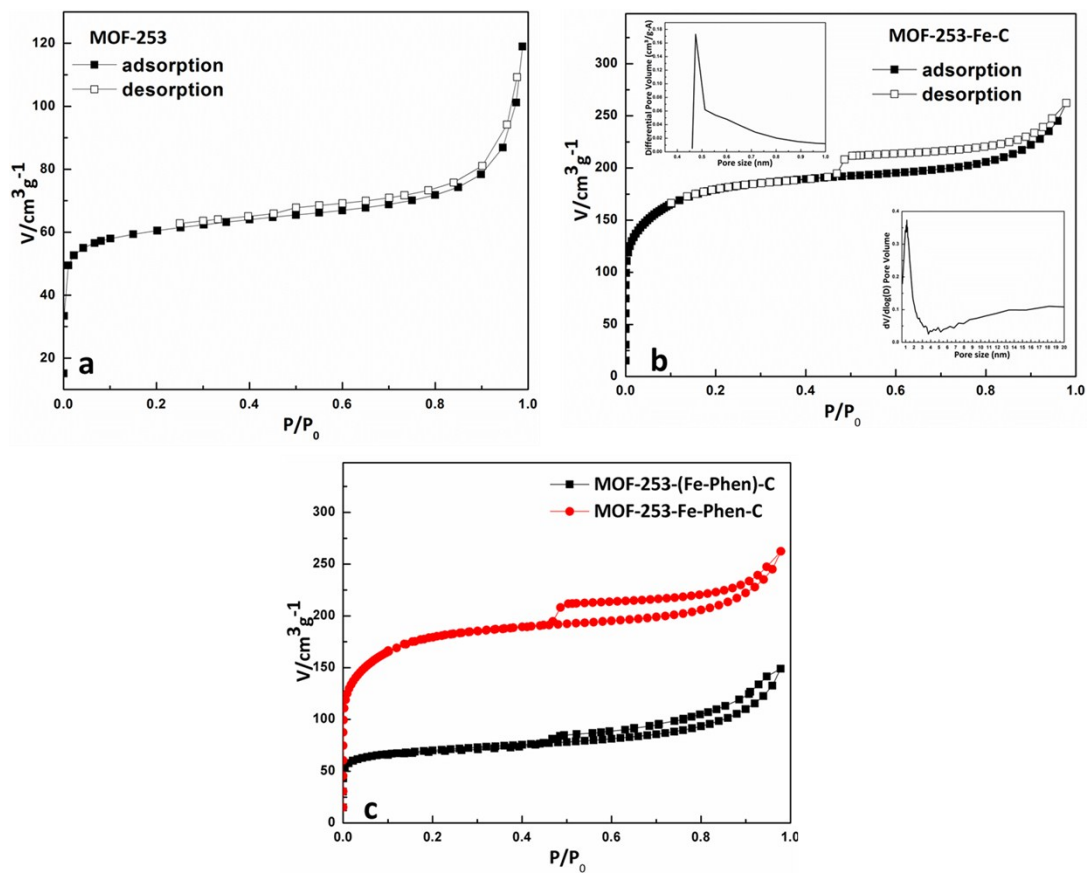

**Figure S6.** Nitrogen adsorption/desorption isotherms and the corresponding pore size distribution curves for a), MOF-253, b) MOF-253-Fe-Phen-C, c), MOF-253-(Fe-phen)-C.

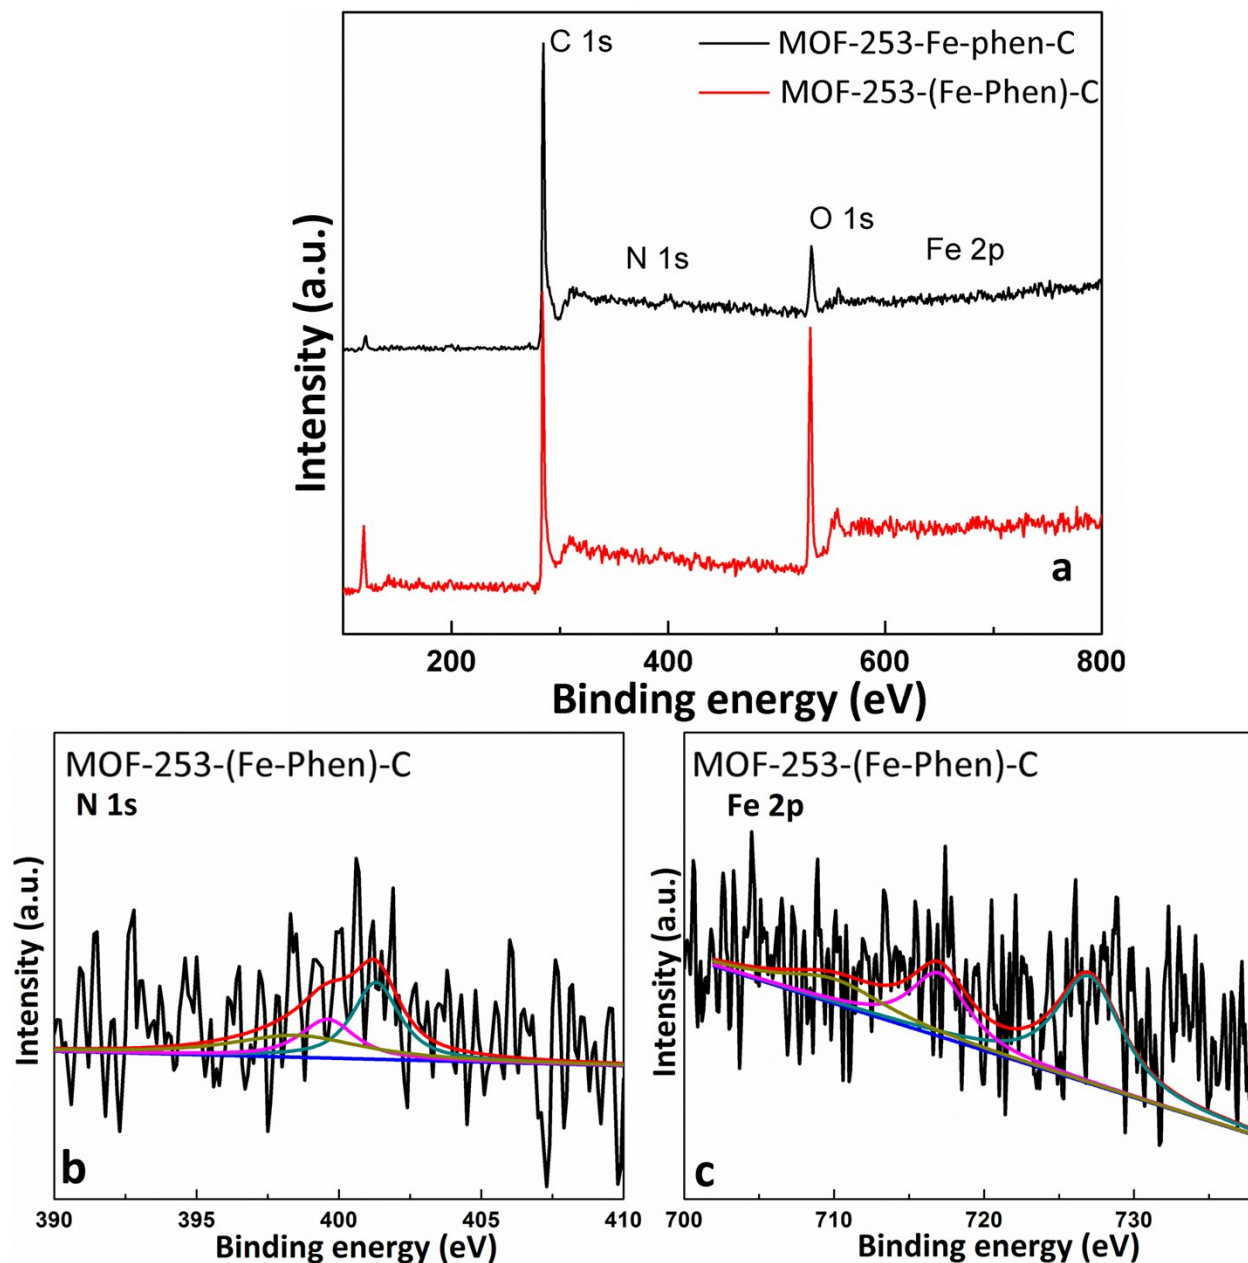

**Figure S7.** XPS survey scan of MOF-253-Fe-phen-C and MOF-253-(Fe-Phen)-C (a), high-resolution N 1s XPS spectra of MOF-253-(Fe-Phen)-C (b), high-resolution Fe 2p XPS spectra of MOF-253-(Fe-Phen)-C (c).

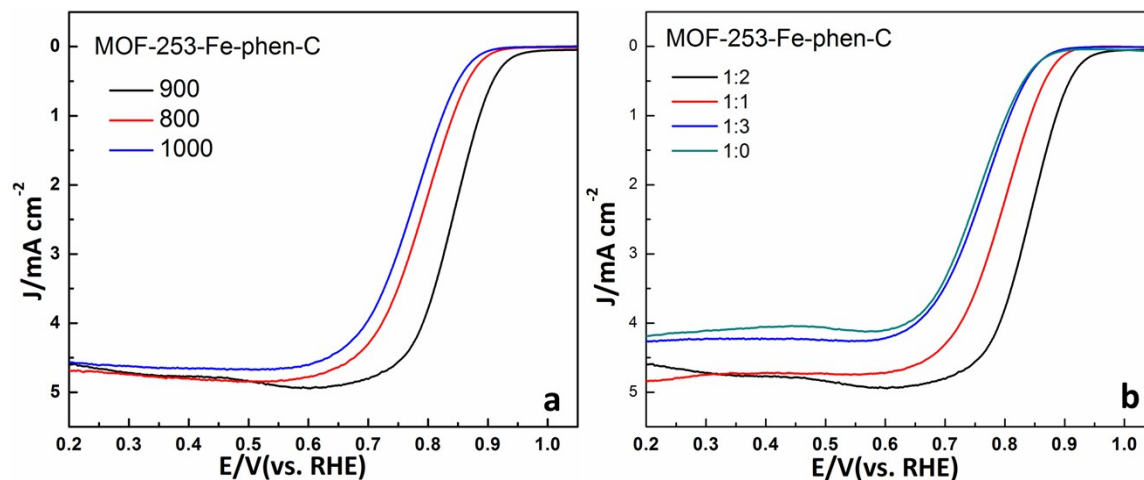

**Figure S8.** RDE voltammograms of MOF-253-Fe-phen-C pyrolyzed at different temperatures in  $\text{O}_2$ -saturated 0.1 M KOH (a), RDE voltammograms of MOF-253-Fe-phen-C pyrolyzed by heating the mixtures containing different molar ratio of MOF-253-Fe and 1, 10-Phenanthroline at 900 °C and HCl etching in  $\text{O}_2$ -saturated 0.1 M KOH. Note, 1:0 means that no 1, 10-Phenanthroline is added in MOF-253-Fe precursor (b).

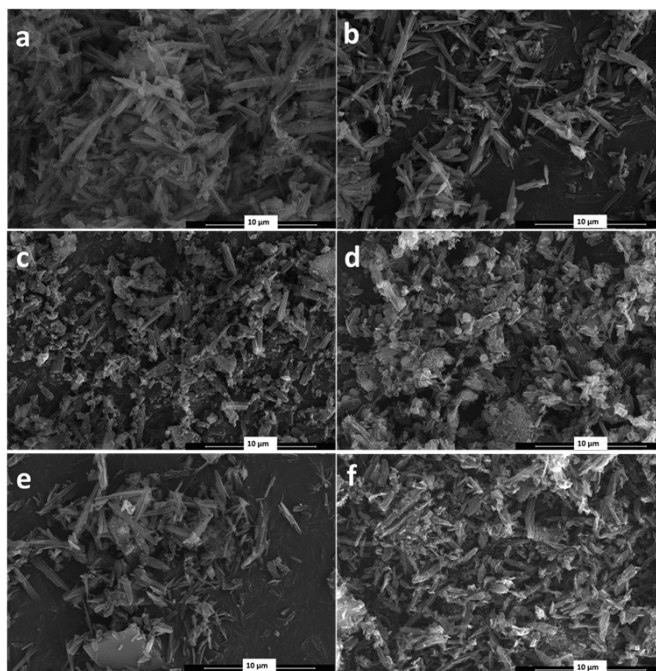

**Figure S9.** SEM images (a) MOF-253, (b) MOF-253-Fe, (c) MOF-253-Fe-Phen, (d) MOF-253-Fe-Phen-C, (e) MOF-253-(Fe-Phen), (f) MOF-253-(Fe-Phen)-C.

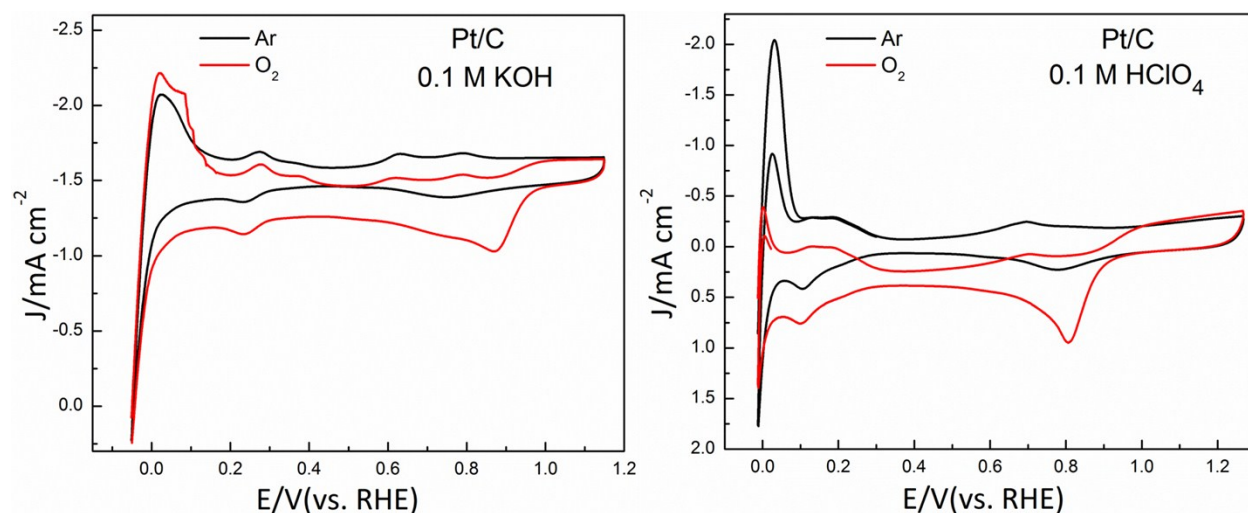

**Figure S10.** Cyclic voltammograms of Pt/C in O<sub>2</sub>-saturated 0.1 M KOH and HClO<sub>4</sub>.

**Table S1.** Summarized iron contents by ICP-OES measurements.

| Samples | MOF-253-Fe-phen | MOF-253-(Fe-Phen) | MOF-253-Fe-phen-C | MOF-253-(Fe-Phen)-C |
|---------|-----------------|-------------------|-------------------|---------------------|
| Fe wt.% | 5.50            | 0.63              | 0.77              | 0.27                |

**Table S2.** The XPS surface species analyses of MOF-253-Fe-phen-C and MOF-253-(Fe-Phen)-C determined by XPS.

| Samples             | Graphitic nitrogen atom % | Metal nitrogen atom % | Pyridinic nitrogen atom % |
|---------------------|---------------------------|-----------------------|---------------------------|
| MOF-253-Fe-phen-C   | 60.68                     | 22.31                 | 17.01                     |
| MOF-253-(Fe-Phen)-C | 42.05                     | 24.76                 | 33.19                     |

**Table S3.** Elemental compositions of MOF-253-Fe-phen-C and MOF-253-(Fe-Phen)-C determined by elemental analysis.

| Samples             | C wt. % | H wt. % | N wt. % |
|---------------------|---------|---------|---------|
| MOF-253-Fe-phen-C   | 53.53   | 0.99    | 1.34    |
| MOF-253-(Fe-Phen)-C | 47.82   | 1.766   | 0.68    |



**Table S4.** Electrocatalytic activity of carbon materials derived from pyridine as nitrogen source.

| Catalyst                                                    | Electrolyte | Onset potential, V | Reference |
|-------------------------------------------------------------|-------------|--------------------|-----------|
| [Zn(bpdc)DMA] ·DMF /C                                       | 0.1 M KOH   | -0.14 ( SCE)       | 5         |
| 4,4'-bipyridine and FeCl <sub>3</sub> ·6H <sub>2</sub> O /C | 0.1 M KOH   | 0.98 ( RHE)        | 6         |
| Pyridine and CoSO <sub>4</sub> ·7H <sub>2</sub> O /C        | 0.1 M KOH   | 0.014 ( SCE)       | 7         |
| Current work                                                | 0.1 M KOH   | 0.98 ( RHE)        |           |

1. R. Kothandaraman, V. Nallathambi, K. Artyushkova and S. C. Barton, *Applied Catalysis B: Environmental*, 2009, 92, 209-216.
2. W. Gang, C. M. Johnston, N. H. Mack, K. Artyushkova, M. Ferrandon, M. Nelson, J. S. Lezama-Pacheco, S. D. Conradson, K. L. More, D. J. Myers and P. Zelenay, *J. Mater. Chem.*, 2011, 21, 11392-11405.
3. A. Kong, Y. Kong, X. Zhu, Z. Han and Y. Shan, *Carbon*, 2014, 78, 49-59.
4. Y. Zhao, K. Watanabe and K. Hashimoto, *J. Am. Chem. Soc.*, 2012, 134, 19528-19531.
5. D. Zhu, L. Li, J. Cai, M. Jiang, J. Qi and X. Zhao, *Carbon*, 2014, 79, 544.
6. Y. Wang, A. Kong, X. Chen, Q. Lin, and P. Y. Feng. *Acs Catal.*, 2015, 5, 3887.
7. J. Qiao, L. Xu, L. Ding, L. Zhang, R. Baker, X. Dai, J. Zhang. *Appl. Catal., B.*, 2012, 125, 197.
